# Supplementary material
Source: PubMed Central journal article supplement (PMC9112901)
Supplement: aac.01790-21-s0001.pdf [file aac.01790-21-s0001.pdf]

## Supplemental Materials

| <u>Isolate</u> | <u>MexAB-OprM regulators</u>                   |                |             | <u>β-lactam resistance determinants</u>  |                                                             | <u>Penicillin Binding Proteins</u>                      |                                                    |                    |                                   |                    |
|----------------|------------------------------------------------|----------------|-------------|------------------------------------------|-------------------------------------------------------------|---------------------------------------------------------|----------------------------------------------------|--------------------|-----------------------------------|--------------------|
|                | <u>NalB (MexR)</u>                             | <u>NalC</u>    | <u>NalD</u> | <u>PA5471</u>                            | <u>MexZ</u>                                                 | <u>PBP1a (PonA)</u>                                     | <u>PBP2</u>                                        | <u>PBP3 (FtsL)</u> |                                   |                    |
| PAO1           | WT                                             | WT             | WT          | WT                                       | WT                                                          | WT                                                      | WT                                                 | WT                 |                                   |                    |
| CLB 24388      | WT                                             | G71E,<br>S209R | WT          | C40R, L88P, D161G<br>H182Q, V243A        | Q103 del                                                    | WT<br>P388S<br>insertion of a P<br>btw A615 and<br>D616 | WT                                                 | WT                 |                                   |                    |
| EM 2972704     | V126E                                          | G71E,<br>S209R | WT          | C40R, L88P, S112N<br>D119E, I237V, V243A | D83E, L138R<br>R187 to F192 del                             | insertion of a P<br>btw A615 and<br>D616, and V643I     | N117S                                              | WT                 |                                   |                    |
| <u>Isolate</u> | <u>Fluoroquinolone resistance determinants</u> |                |             |                                          | <u>Aminoglycoside resistance determinants</u>               |                                                         | <u>Polymyxin and other resistance determinants</u> |                    |                                   |                    |
|                | <u>GyrA</u>                                    | <u>GyrB</u>    | <u>ParC</u> | <u>ParE</u>                              | <u>AMEs</u>                                                 | <u>PhoP</u>                                             | <u>PhoQ</u>                                        | <u>Polymyxin</u>   | <u>Phenicol,<br/>Sulfonamide</u>  |                    |
| PAO1           | WT                                             | WT             | WT          | WT                                       |                                                             | WT                                                      | WT                                                 | <u>PmrA</u><br>WT  | <u>PmrB</u><br>WT                 |                    |
| CLB 24388      | T83I                                           | WT             | S87L        | WT                                       | <i>aac(6′)-Ib4</i><br><i>aac(3)-I</i> family                | WT                                                      | WT                                                 | WT                 | Y345H                             | <i>catB7, sul1</i> |
| EM 2972704     | T83I                                           | WT             | S87L        | WT                                       | <i>aadA1</i> ,<br><i>aac(6′)-33</i> ,<br><i>aac(6′)-Ib4</i> | WT                                                      | WT                                                 | L71R               | S2P, A4T,<br>V15I, G68S,<br>Y345H | <i>catB7, sul1</i> |

**Table S1. Additional resistance determinants**

*P. aeruginosa* PAO1 genome sequence NC\_002516.2 was used as the reference genome. Reference comparator amino acid sequences from PAO1 (“WT” - wildtype) listed in Table S1 are as follows: NalB (MexR), NP\_249115.1; NalC, NP\_252410.1; NalD, NP\_2552264.1; PA5471, NP\_254158.1; MexZ, AF073776; PBP1A (PonA), NP\_253732.1; PBP2, NP\_252692.1; PBP3 (FtsL), NP\_253109.1; GyrA, NP\_251858.1; GyrB, NP\_064724.1; ParC, NP\_253651.1; ParE, NP\_253654.1; PhoP, NP\_249870.1; PhoQ, NP\_249871.1; PmrA, NP\_253464.1; PmrB, NP\_253465.1. Abbreviations PBP, penicillin binding protein; QRDR, quinolone resistance-determining region; AME aminoglycoside modifying enzyme.

| Variant | 1 | 79 | 149 | 178 | 329 | 364 |
|---------|---|----|-----|-----|-----|-----|
| PDC-1   | G | T  | L   | V   | V   | G   |
| PDC-3   | G | A  | L   | V   | V   | G   |
| PDC-8   | G | A  | R   | V   | V   | G   |
| PDC-19a | D | A  | L   | L   | I   | A   |

Differences by SANC position between PDC-1, PDC-3, PDC-8, and PDC-19a.

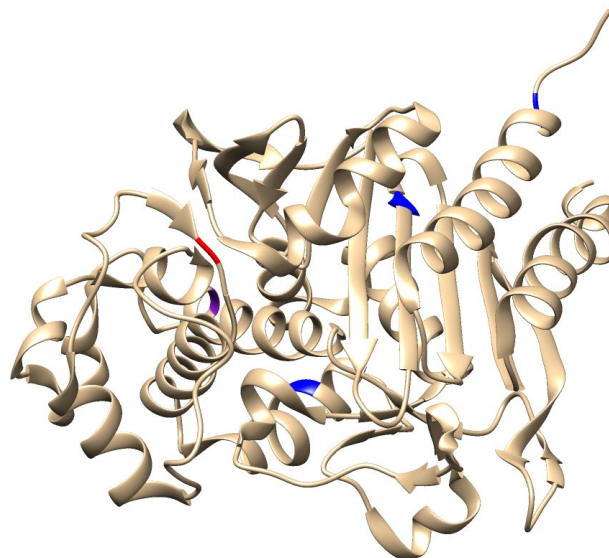

**Figure S1.** Substitutions present in PDC-8 (red), PDC-19a (blue), or both (purple) compared to PDC-1.

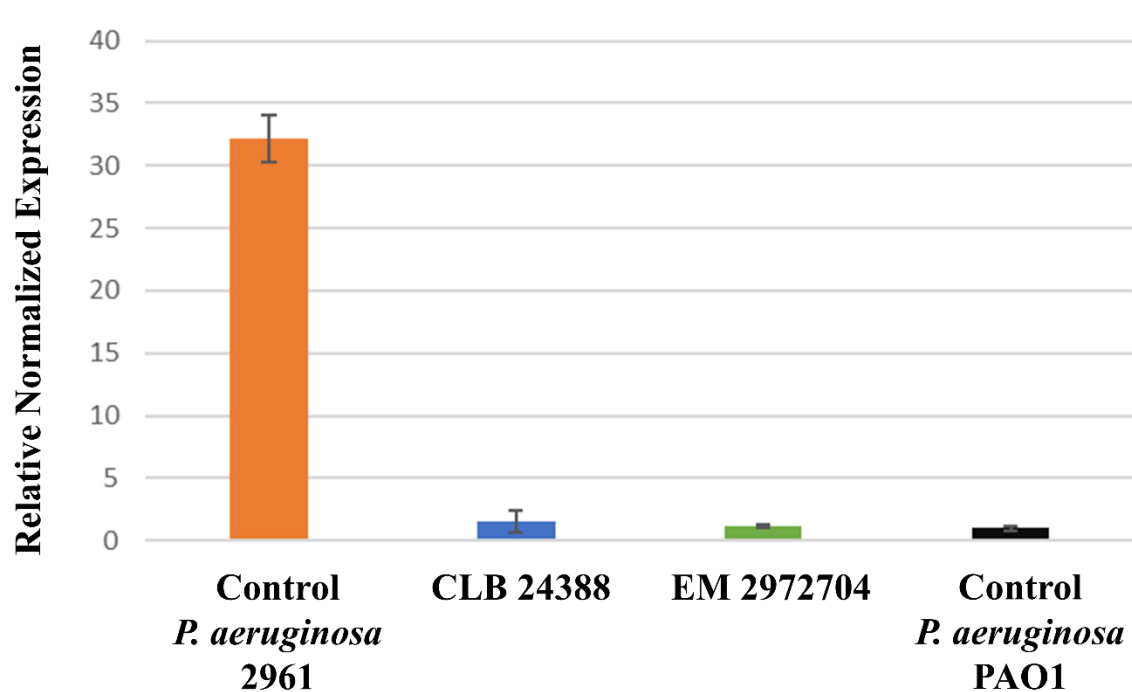

**Figure S2.** Normalized expression of AmpC (PDC-8 in CLB 24388 and PDC-19a in EM 2972704) in the two study isolates was not significantly different than in the *P. aeruginosa* control strain PAO1 (PDC-1). However, expression of AmpC in isolates CLB 24388 and EM 2972704 was 22-fold and 27-fold less, respectively, than in the *P. aeruginosa* control strain 2961 which is known to overexpress its AmpC (PDC-16) due to a D135N mutation in AmpR. This demonstrates that the PDCs in CLB 24388 and EM 2972704 are not overexpressed. Expression of PDC was set at 1.0 in PAO1 and relative expression of variant genes is presented as the mean  $\pm$  standard deviations.

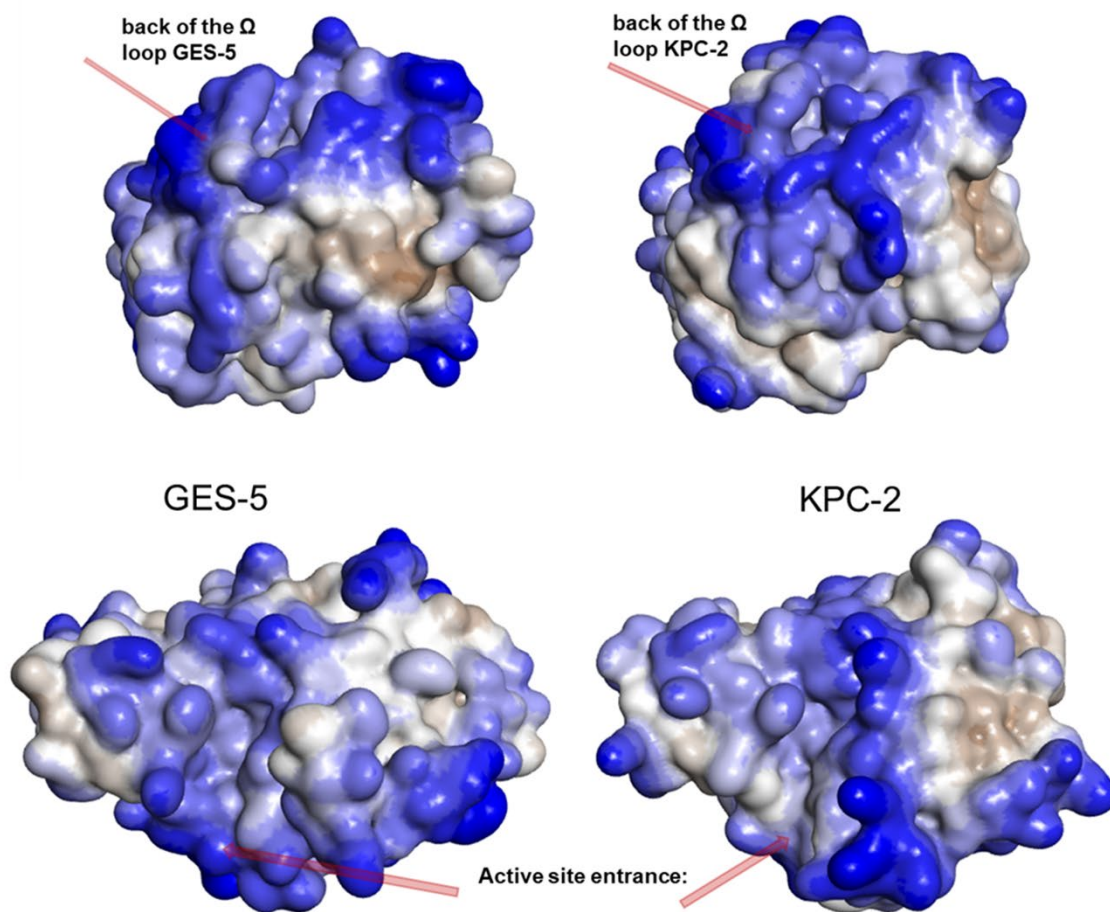

**Figure S3.** Connolly surface of the active site entrance: change in the shape and hydrophobicity. In KPC-2 the active site entrance is more hydrophobic, and the active site is larger and shallower. Whereas in GES-20 (GES-5), the active site entrance is more hydrophilic, and the active site is deeper.

## Supplemental Results and Discussion of Other Resistance Determinants

An analysis of other non- $\beta$ -lactam resistance determinants that play a role in the XDR phenotype of these isolates were analyzed and differences found in comparison to the orthologous genes in PAO1 WT are shown in **Table S1**. Both isolates possessed substitutions in their quinolone resistance-determining regions (QRDRs), specifically the previously described T83I in GyrA and S87L in ParC (1-4). The sequences of GyrB and ParE were identical to PAO1. The T83I substitution in GyrA and the S87L in ParC, found in both isolates, are known mechanisms of resistance to the fluoroquinolone antibiotics ciprofloxacin and levofloxacin (1-4).

Aminoglycoside modifying enzyme (AME) genes were also present: *aac(6')*-Ib4 and an *aac(3)*-I family gene were found in CLB 24388, and *aadA1*, *aac(6')*-33, and *aac(6')*-Ib4 in EM 2972704 (**Table S1**). AME genes were also present: *aac(6')*-Ib4 in both isolates, with the addition of *aadA1* and *aac(6')*-33 in isolate EM 2972704, and an *aac(3)*-I family gene in CLB 24388. These genes are known to encode aminoglycoside modifying enzymes that are responsible for aminoglycoside resistance and contribute to the amikacin and gentamicin resistant phenotypes (5).

The colistin resistance-associated genes *phoP*, *phoQ*, *pmrA*, and *pmrB* were next examined. The translated PhoP and PhoQ were identical to PAO1 in both isolates, as was PmrA in isolate CLB 24388. Differences in amino acid sequence were observed for PmrB, relative to that of PAO1, in both isolates. PmrB in isolate CLB 24388 had a Y345H substitution, and isolate EM 2972704 had S2P, A4T, V15I, G68S, Y345H substitutions. The differences in amino acid sequence observed for PmrB, relative to that of PAO1, in both isolates are notable, as all of the reported mutations have been associated with colistin resistant *Pseudomonas* isolates (6-10). However, their exact role in the colistin resistant phenotype is not known. Other resistance genes found in both isolates were *catB7* and *sul1* conferring chloramphenicol and sulfonamide

resistance, respectively. Regulators of the main efflux pumps were also analyzed, differences were found between their sequence and that of orthologous sequences in PAO1, but those differences have not been described previously as affecting efflux and their exact role is not known.

## **Supplemental Methods**

### ***PCR amplification, cloning, and sequencing***

PCR amplification of *oprD* in EM 2972704 was performed using the primers and methodology described by Cabot et al. (11). PCR amplification of the stop gap region and adjacent sequence in CLB 24388 was performed using primers GESATG 5' ATGCGCTTCATTCACGCA 3' and OXA-5R 5' TTAGCCACCAATGATG 3'. The amplified integron fragment was then cloned into the Invitrogen pCR-XL-TOPO vector (Thermo Fisher) according to the manufacturer's protocol and direct sequencing of the plasmid preparation was performed. The positive amplicon and plasmid preparation were sequenced at a commercial sequencing facility (MCLAB). DNA sequence analysis was performed using Lasergene 7.2 (DNASTAR,). The final amino acid sequences were determined using the ExPASy Translate tool and sequences were compared with BLAST online software (<http://blast.ncbi.nlm.nih.gov>), using the protein blast algorithm.

### ***qRT-PCR***

The *P. aeruginosa* strains were grown to mid-log phase at 37°C and treated with Qiagen RNAprotect Cell Reagent (Qiagen). Cells were harvested and total mRNA was extracted using the Qiagen RNeasy Mini Kit including the on-column DNase digestion according to the manufacturer's protocol. To confirm the absence of genomic DNA, negative control reactions were performed without RNA reverse transcriptase (no-RT controls). qRT-PCR was performed on an CFX96 Touch Real-Time PCR detection system (Bio-Rad) using the iTaq™ Universal SYBR® Green One-Step Kit (Bio-Rad) according to the manufacturer's instructions; 2 µl total mRNA

(62.5 ng/ul) was used in each reaction. The *rplS* gene coding for the 50S ribosomal protein L19 was used as an internal control for quantitation of mRNA levels (12) (*ampC*: 5' GATACCAGATTCCCCTGC 3', 5' GGTTCCTCTTCAGGCTG 3'; *rplS*: 5' ACCCGAGGTGTCCAGCGAACC 3', 5' GCTGCAAACTGCCCGCAACG 3'). Amplification was undertaken in 20  $\mu$ L final volume using the following protocol: reverse transcription 50°C for 10 min, 95°C for 1 min, followed by 40 cycles consisting of 10 sec at 95°C, 35 sec at 60°C. Experiments were conducted in triplicate. *AmpC* expression in all samples was normalized to *rplS* coding for the 50S ribosomal protein L19, which was used as the internal control for quantitation of mRNA levels. Expression of *AmpC* for PAO1 was set at 1.0, and relative expression of variant genes presented as means  $\pm$  standard deviations. Significance was defined as  $\geq$  2-fold difference in expression.

## References

1. Bruchmann S, Dotsch A, Nouri B, Chaberny IF, Haussler S. 2013. Quantitative contributions of target alteration and decreased drug accumulation to *Pseudomonas aeruginosa* fluoroquinolone resistance. *Antimicrob Agents Chemother* 57:1361-8.
2. Del Barrio-Tofino E, Lopez-Causape C, Cabot G, Rivera A, Benito N, Segura C, Montero MM, Sorli L, Tubau F, Gomez-Zorrilla S, Tormo N, Dura-Navarro R, Viedma E, Resino-Foz E, Fernandez-Martinez M, Gonzalez-Rico C, Alejo-Cancho I, Martinez JA, Labayru-Echverria C, Duenas C, Ayestaran I, Zamorano L, Martinez-Martinez L, Horcajada JP, Oliver A. 2017. Genomics and Susceptibility Profiles of Extensively Drug-Resistant *Pseudomonas aeruginosa* Isolates from Spain. *Antimicrob Agents Chemother* 61:e01589-17.
3. Kos VN, Deraspe M, McLaughlin RE, Whiteaker JD, Roy PH, Alm RA, Corbeil J, Gardner H. 2015. The resistome of *Pseudomonas aeruginosa* in relationship to phenotypic susceptibility. *Antimicrob Agents Chemother* 59:427-36.
4. Lopez-Causape C, Cabot G, Del Barrio-Tofino E, Oliver A. 2018. The Versatile Mutational Resistome of *Pseudomonas aeruginosa*. *Front Microbiol* 9:685.
5. Aghazadeh M, Rezaee MA, Nahaei MR, Mahdian R, Pajand O, Saffari F, Hassan M, Hojabri Z. 2013. Dissemination of aminoglycoside-modifying enzymes and 16S rRNA methylases among *Acinetobacter baumannii* and *Pseudomonas aeruginosa* isolates. *Microb Drug Resist* 19:282-8.
6. Barrow K, Kwon DH. 2009. Alterations in two-component regulatory systems of *phoPQ* and *pmrAB* are associated with polymyxin B resistance in clinical isolates of *Pseudomonas aeruginosa*. *Antimicrob Agents Chemother* 53:5150-4.



7. Lee JY, Choi MJ, Choi HJ, Ko KS. 2016. Preservation of Acquired Colistin Resistance in Gram-Negative Bacteria. *Antimicrob Agents Chemother* 60:609-12.
8. Lee JY, Ko KS. 2014. Mutations and expression of PmrAB and PhoPQ related with colistin resistance in *Pseudomonas aeruginosa* clinical isolates. *Diagn Microbiol Infect Dis* 78:271-6.
9. Lin J, Xu C, Fang R, Cao J, Zhang X, Zhao Y, Dong G, Sun Y, Zhou T. 2019. Resistance and Heteroresistance to Colistin in *Pseudomonas aeruginosa* Isolates from Wenzhou, China. *Antimicrob Agents Chemother* 63:e00556-19.
10. Schurek KN, Sampaio JL, Kiffer CR, Sinto S, Mendes CM, Hancock RE. 2009. Involvement of pmrAB and phoPQ in polymyxin B adaptation and inducible resistance in non-cystic fibrosis clinical isolates of *Pseudomonas aeruginosa*. *Antimicrob Agents Chemother* 53:4345-51.
11. Cabot G, Ocampo-Sosa AA, Dominguez MA, Gago JF, Juan C, Tubau F, Rodriguez C, Moya B, Pena C, Martinez-Martinez L, Oliver A, Spanish Network for Research in Infectious D. 2012. Genetic markers of widespread extensively drug-resistant *Pseudomonas aeruginosa* high-risk clones. *Antimicrob Agents Chemother* 56:6349-57.
12. Wang Y, Gao L, Rao X, Wang J, Yu H, Jiang J, Zhou W, Wang J, Xiao Y, Li M, Zhang Y, Zhang K, Shen L, Hua Z. 2018. Characterization of *lasR*-deficient clinical isolates of *Pseudomonas aeruginosa*. *Sci Rep* 8:13344.
